# Supplementary material
Source: PubMed Central journal article supplement (PMC5791078)
Supplement: ASN.2017070765SupplementaryData1.pdf [file ASN.2017070765SupplementaryData1.pdf]

# Regional Health System Deployment of Clinical Decision Support for Detection of Acute Kidney Injury: Effects on Hospital Survival and Length of Stay

## ***Supplementary Appendix***

| Contents                                                                                                                                            | Page |
|-----------------------------------------------------------------------------------------------------------------------------------------------------|------|
| Supplementary Table 1: Kidney Disease Improving Global Outcomes (KDIGO) Acute Kidney Injury Classification                                          | 2    |
| Supplementary Table 2: Sensitivity Analysis. Medical versus Surgical Admissions                                                                     | 3    |
| Supplementary Table 3. Covariate-adjusted mortality and length of stay after removing one hospital at a time                                        | 4    |
| Supplementary Table 4. Effect of CDSS on hospital length of stay and mortality by age, severity of illness, and medical versus surgical admissions. | 5    |

**Supplementary Table 1:** Kidney Disease Improving Global Outcomes (KDIGO) Acute Kidney Injury Classification

| Stage | Serum creatinine                                                                                                                                       | Urine Output                                          |
|-------|--------------------------------------------------------------------------------------------------------------------------------------------------------|-------------------------------------------------------|
| 1     | ≥1.5 times baseline<br>OR<br>0.3mg/dl increase                                                                                                         | < 0.5ml/kg/hr for ≥ 6hrs                              |
| 2     | ≥2 times baseline                                                                                                                                      | < 0.5ml/kg/hr for ≥ 12hrs                             |
| 3     | ≥3 times baseline<br>OR<br>increase in creatinine to ≥ 4.0 mg/dl<br><br>In patients <18 yrs decrease of eGFR to less than 35 ml/min/1.73m <sup>2</sup> | < 0.3ml/kg/hr for ≥ 24hrs<br>OR<br>Anuria for ≥ 12hrs |

Source: Kidney Disease: Improving Global Outcomes (KDIGO) Clinical Practice Guideline for Acute Kidney Injury. *Kidney inter, Suppl* 2012; 2 : 1–138. 2012

**Supplementary Table 2: Sensitivity Analysis: Medical and Surgical Unit data specific outcomes**

Medical Patients (N=341,179)

| <b>Mortality</b>           |                |                 |                     |        |
|----------------------------|----------------|-----------------|---------------------|--------|
|                            | Pre, n (%)     | Post, n (%)     | OR                  | p      |
| No AKI                     | 1882 (1.9%)    | 3323 (1.7%)     | 0.738 [0.661-0.825] | <0.001 |
| AKI                        | 1525 (10.1%)   | 3045 (9.0%)*    | 0.563 [0.480-0.660] | <0.001 |
| AKI / pre-post interaction |                |                 | 0.793 [0.723-0.869] | <0.001 |
| <b>Length of stay</b>      |                |                 |                     |        |
|                            | Pre, mean ± SD | Post, mean ± SD | IRR                 | p      |
| No AKI                     | 5.4±9.5        | 5.4±9.7         | 0.966 [0.940-0.992] | 0.01   |
| AKI                        | 7.2±6.9        | 7.1±7.1*        | 0.908 [0.863-0.954] | <0.001 |
| AKI / pre-post interaction |                |                 | 0.952 [0.929-0.975] | <0.001 |

Surgical Patients (N= 186,460)

| <b>Mortality</b>           |                |                 |                     |        |
|----------------------------|----------------|-----------------|---------------------|--------|
|                            | Pre, n (%)     | Post, n (%)     | OR                  | p      |
| No AKI                     | 467 (0.8%)     | 913 (0.8%)      | 0.553 [0.447-0.683] | <0.001 |
| AKI                        | 519 (10.7%)    | 1129 (10.6%)    | 0.715 [0.539-0.949] | 0.02   |
| AKI / pre-post interaction |                |                 | 0.676 [0.569-0.804] | <0.001 |
| <b>Length of stay</b>      |                |                 |                     |        |
|                            | Pre, mean ± SD | Post, mean ± SD | IRR                 | p      |
| No AKI                     | 5.0±6.5        | 5.0±6.2         | 0.800 [0.781-0.818] | <0.001 |
| AKI                        | 16.0±18.4      | 15.2±15.8*      | 0.803 [0.723-0.892] | <0.001 |
| AKI / pre-post interaction |                |                 | 0.772 [0.739-0.808] | <0.001 |

Shown are unadjusted results from mortality and length of stay stratified by medical vs. surgical patients. \*P<0.05 for unadjusted comparison between Pre- and Post-. Covariate adjusted odds ratios (OR), incidence rate ratios (IRR), and interactions are also shown with corresponding p-values. AKI, acute kidney injury; SD, standard deviation.

**Supplementary Table 3:** Covariate-adjusted mortality and length of stay after removing one hospital at a time

**Mortality**

| Hospital removed      | OR    | SE    | p     | Lower 95% CI | Upper 95% CI |
|-----------------------|-------|-------|-------|--------------|--------------|
| 1                     | 0.760 | 0.036 | <.001 | 0.692        | 0.835        |
| 2                     | 0.762 | 0.032 | <.001 | 0.702        | 0.827        |
| 3                     | 0.764 | 0.032 | <.001 | 0.703        | 0.830        |
| 4                     | 0.792 | 0.035 | <.001 | 0.726        | 0.864        |
| 5                     | 0.759 | 0.032 | <.001 | 0.700        | 0.824        |
| 6                     | 0.760 | 0.032 | <.001 | 0.700        | 0.824        |
| 7                     | 0.769 | 0.032 | <.001 | 0.709        | 0.834        |
| 8                     | 0.763 | 0.032 | <.001 | 0.702        | 0.830        |
| 9                     | 0.758 | 0.033 | <.001 | 0.696        | 0.826        |
| 10                    | 0.761 | 0.032 | <.001 | 0.701        | 0.826        |
| 11                    | 0.757 | 0.034 | <.001 | 0.694        | 0.826        |
| 12                    | 0.762 | 0.035 | <.001 | 0.698        | 0.833        |
| 13                    | 0.743 | 0.032 | <.001 | 0.683        | 0.808        |
| 14                    | 0.763 | 0.031 | <.001 | 0.704        | 0.827        |
| <b>Length of stay</b> |       |       |       |              |              |
| Hospital removed      | IRR   | SE    | p     | Lower 95% CI | Upper 95% CI |
| 1                     | 0.918 | 0.007 | <.001 | 0.904        | 0.933        |
| 2                     | 0.907 | 0.007 | <.001 | 0.894        | 0.920        |
| 3                     | 0.910 | 0.007 | <.001 | 0.897        | 0.923        |
| 4                     | 0.907 | 0.007 | <.001 | 0.893        | 0.921        |
| 5                     | 0.906 | 0.007 | <.001 | 0.893        | 0.920        |
| 6                     | 0.906 | 0.007 | <.001 | 0.893        | 0.919        |
| 7                     | 0.912 | 0.007 | <.001 | 0.899        | 0.926        |
| 8                     | 0.907 | 0.007 | <.001 | 0.894        | 0.921        |
| 9                     | 0.906 | 0.007 | <.001 | 0.892        | 0.920        |
| 10                    | 0.907 | 0.007 | <.001 | 0.894        | 0.920        |
| 11                    | 0.908 | 0.007 | <.001 | 0.895        | 0.922        |
| 12                    | 0.902 | 0.007 | <.001 | 0.888        | 0.916        |
| 13                    | 0.907 | 0.007 | <.001 | 0.894        | 0.921        |
| 14                    | 0.900 | 0.006 | <.001 | 0.888        | 0.912        |

OR, odds ratio; IRR, incidence rate ratios; SE, standard error; CI, confidence interval.

**Supplementary Table 4:** Effect of CDSS on hospital length of stay and mortality by age, severity of illness, and medical versus surgical admissions.

Length of Stay

|                    | IRR   | p     | LCI   | UCI   | p*    |
|--------------------|-------|-------|-------|-------|-------|
| Age≥60             | 0.896 | <.001 | 0.873 | 0.919 | 0.974 |
| Age<60             | 0.853 | <.001 | 0.809 | 0.898 |       |
| Charlson index >0  | 0.890 | <.001 | 0.868 | 0.912 | 0.286 |
| Charlson index = 0 | 0.879 | 0.002 | 0.810 | 0.954 |       |
| Surgical           | 0.772 | <.001 | 0.739 | 0.808 | 0.023 |
| Medical            | 0.952 | <.001 | 0.929 | 0.975 |       |

Mortality

|                    | OR    | p     | LCI   | UCI   | p*    |
|--------------------|-------|-------|-------|-------|-------|
| Age≥60             | 0.745 | <.001 | 0.681 | 0.816 | 0.005 |
| Age<60             | 0.870 | 0.131 | 0.726 | 1.043 |       |
| Charlson index >0  | 0.798 | <.001 | 0.734 | 0.867 | 0.888 |
| Charlson index = 0 | 0.629 | 0.002 | 0.472 | 0.838 |       |
| Surgical           | 0.676 | <.001 | 0.569 | 0.804 | 0.127 |
| Medical            | 0.793 | <.001 | 0.723 | 0.869 |       |

\*p-value for the interaction between strata; CDSS: clinical decision support system; IRR: incidence rate ratio; OR: odds ratio; LCI: lower confidence interval; UCI: upper confidence interval.
